# Supplementary material for: Simultaneous attenuation of hyperglycemic memory-induced retinal, pulmonary, and glomerular dysfunctions by proinsulin C-peptide in diabetes
Source: PubMed Central journal article supplement (PMC9926630; doi:10.1186/s12916-023-02760-7), 2023-02-13

**Full length images for figure 5E**

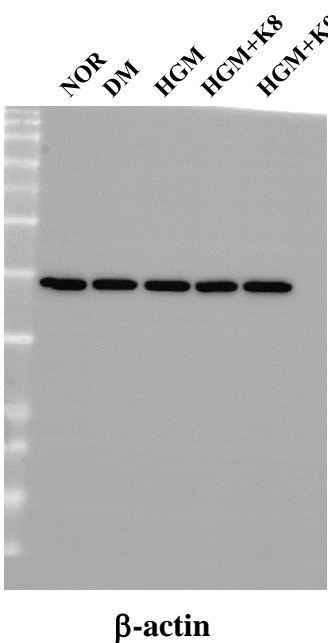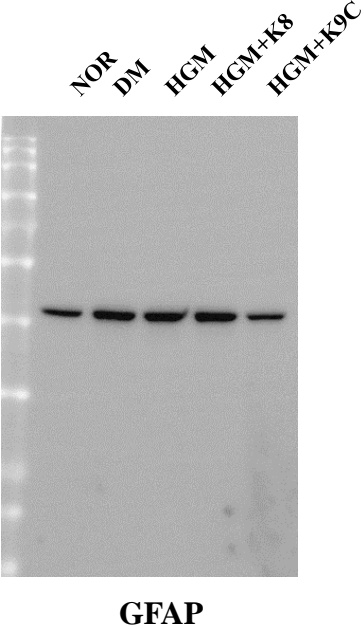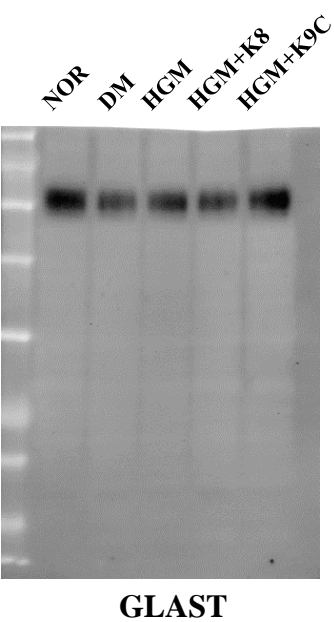

Supplement: 12916_2023_2760_MOESM1_ESM.pdf [file 12916_2023_2760_MOESM1_ESM.pdf]
